# Supplementary material for: Treatment delay and fatal outcomes of pulmonary tuberculosis in advanced age: a retrospective nationwide cohort study
Source: Springer Nature journal article supplement (doi:10.1186/s12879-017-2554-y), 2017-06-24
Supplement: MOESM1 [file 12468862]

**Fig S1.** Schematic diagram for the calculation of delay in anti-tuberculosis treatment (ID, infectious disease; MTB-NAAT, *Mycobacterium tuberculosis*-nucleic acid amplification test)

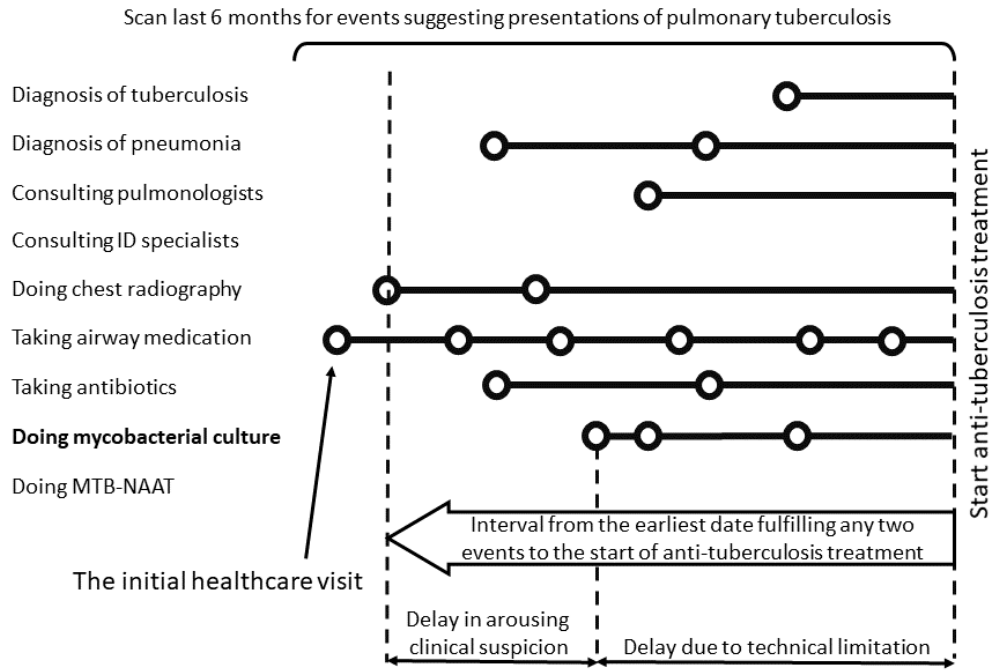

**Table S1.** Clinical characteristics of the 81081 adult patients with pulmonary tuberculosis diagnosed from 2004 to 2009 stratified by sex

|                                              | Female<br>N=24914 | Male<br>N=56167  | P-value |
|----------------------------------------------|-------------------|------------------|---------|
| Age (year)                                   | 59.8 (40.4–75.8)  | 66.6 (50.3–77.3) | <0.001  |
| Pre-DOTS era (2004–2005)                     | 8621 (34.6%)      | 20292 (36.1%)    | <0.001  |
| DOTS era (2006–2009)                         | 16293 (65.4%)     | 35875 (63.9%)    |         |
| Any comorbidities                            | 9275 (37.2%)      | 24624 (43.8%)    | <0.001  |
| Diabetes mellitus                            | 6595 (26.5%)      | 16407 (29.2%)    | <0.001  |
| COPD                                         | 1301 (5.2%)       | 5331 (9.5%)      | <0.001  |
| Malignancy                                   | 1753 (7.0%)       | 5311 (9.5%)      | <0.001  |
| ESRD                                         | 839 (3.4%)        | 1070 (1.9%)      | <0.001  |
| Autoimmune disease                           | 538 (2.2%)        | 281 (0.5%)       | <0.001  |
| Liver cirrhosis                              | 106 (0.4%)        | 344 (0.6%)       | 0.001   |
| Pneumoconiosis                               | 2 (0.0%)          | 64 (0.1%)        | <0.001  |
| AIDS                                         | 39 (0.2%)         | 410 (0.7%)       | <0.001  |
| Transplantation                              | 39 (0.2%)         | 85 (0.2%)        | 0.861   |
| Low income status                            | 822 (3.3%)        | 2046 (3.6%)      | 0.015   |
| Characteristics of initial healthcare visits |                   |                  |         |
| Hospital accreditation levels                |                   |                  | <0.001  |
| Medical centers                              | 3340 (13.8%)      | 8326 (14.8%)     |         |
| Regional hospitals                           | 8744 (35.1%)      | 22850 (40.7%)    |         |
| Local hospitals or clinics                   | 12730 (51.1%)     | 24991 (44.5%)    |         |
| In urban area                                | 18838 (75.6%)     | 40806 (72.7%)    | <0.001  |
| Pulmonologists or infection specialists      | 3711 (14.9%)      | 10391 (18.5%)    | <0.001  |
| Duration of anti-TB treatment (day)          | 200 (181–274)     | 207 (181–278)    | <0.001  |
| Treated with isoniazid                       | 184 (126–241)     | 185 (96–249)     | 0.431   |
| Treated with rifamycin                       | 183 (149–232)     | 188 (153–252)    | <0.001  |
| Treated with ethambutol                      | 169 (95–211)      | 172 (99–227)     | <0.001  |
| Treated with pyrazinamide                    | 58 (38–78)        | 61 (37–84)       | <0.001  |
| Intensive phase (first 2 months)             |                   |                  |         |
| Treated with isoniazid (day)                 | 60 (46–60)        | 60 (45–60)       | 0.010   |

|                                                                         |               |               |        |
|-------------------------------------------------------------------------|---------------|---------------|--------|
| Treated with rifamycin (day)                                            | 53 (44–60)    | 56 (45–60)    | <0.001 |
| Treated with ethambutol (day)                                           | 56 (43–58)    | 56 (43–58)    | <0.001 |
| Treated with pyrazinamide (day)                                         | 48 (28–57)    | 51 (26–59)    | <0.001 |
| Second-line anti-TB drugs $\geq$ 14 days                                | 3698 (14.8%)  | 10193 (18.1%) | <0.001 |
| Diagnostic procedures during the last 2 months before anti-TB treatment |               |               |        |
| Bronchoscopy                                                            | 2535 (10.2%)  | 5468 (9.7%)   | 0.053  |
| CT scan                                                                 | 9627 (38.6%)  | 20960 (37.3%) | <0.001 |
| CT-guided biopsy                                                        | 450 (1.8%)    | 945 (1.7%)    | 0.211  |
| Hospitalisation within 14 days of commencing anti-TB treatment          |               |               |        |
| Admission to intensive care units                                       | 2479 (10.0%)  | 6037 (10.7%)  | 0.001  |
| Invasive ventilatory support                                            | 2226 (8.9%)   | 5522 (9.8%)   | <0.001 |
| Non-invasive ventilatory support                                        | 411 (1.6%)    | 890 (1.6%)    | 0.496  |
| Anti-TB treatment outcome at one year                                   |               |               |        |
| Completed                                                               | 17874 (71.7%) | 39882 (71.0%) | 0.033  |
| Died                                                                    | 3367 (13.5%)  | 9044 (16.1%)  | <0.001 |
| Died within 2 months                                                    | 1428 (5.7%)   | 3587 (6.4%)   | <0.001 |

Abbreviations: AIDS, acquired immunodeficiency syndrome; COPD, chronic obstructive pulmonary disease; CT, computerised tomography; DOTS, directly observed treatment, short course; ESRD, end-stage renal disease.

Data are expressed as the median (1<sup>st</sup>–3<sup>rd</sup> quartiles) or number (%) as appropriate.

**Table S2** Intervals between specified events possibly indicating the onset of pulmonary tuberculosis (TB) and the commencement of anti-TB treatment in different age groups

| Age (years)                            | No. (%) of patients fulfilling the criteria |                    |                           | Interval from the event to anti-TB treatment (days) |                    |                           |
|----------------------------------------|---------------------------------------------|--------------------|---------------------------|-----------------------------------------------------|--------------------|---------------------------|
|                                        | 20–64<br>(N=40261)                          | 65–79<br>(N=26897) | 80 and above<br>(N=13923) | 20–64<br>(N=40261)                                  | 65–79<br>(N=26987) | 80 and above<br>(N=13923) |
| Clinical diagnosis of tuberculosis     | 37553 (93.3%)                               | 23481 (87.3%)*     | 11301 (81.2%)*†           | 0 (0–1)                                             | 0 (0–3)*           | 0 (0–5)*†                 |
| Diagnosis of pneumonia                 | 8365 (20.8%)                                | 8858 (32.9%)*      | 6616 (47.5%)*†            | 7 (0–40)                                            | 17 (0–62)*         | 24 (0–69)*†               |
| Consulting pulmonologists              | 26037 (64.7%)                               | 18 072 (67.2%)*    | 9583 (68.8%)*†            | 7 (0–35)                                            | 19 (0–76)*         | 26 (0–93)*†               |
| Consulting ID specialists              | 3049 (7.6%)                                 | 2042 (7.6%)        | 1227 (8.8%)*†             | 0 (0–33.5)                                          | 8 (0–68)*          | 21 (0–83)*†               |
| Undergoing chest radiography           | 33330 (82.8%)                               | 22532 (83.8%)*     | 11445 (82.2%)*†           | 10 (0–55)                                           | 34 (5–95)*         | 43 (6–104)*†              |
| Taking airway medication               | 32492 (80.7%)                               | 24038 (89.4%)*     | 12521 (89.9%)*            | 79 (17–146)                                         | 113 (40–162)*      | 112 (38–162)*             |
| Taking antibiotics                     | 26922 (66.9%)                               | 20785 (77.3%)*     | 11830 (85.0%)*†           | 48 (6–120)                                          | 62 (10–130)*       | 61 (9–129)*               |
| <b>Receiving mycobacterial culture</b> | 35772 (88.9%)                               | 24478 (91.0%)*     | 12735 (91.5%)*            | 3 (0–22)                                            | 8 (0–44)*          | 13 (0–51)*†               |
| Undergoing MTB–NAAT                    | 3753 (9.3%)                                 | 2744 (10.2%)*      | 1586 (11.4%)*†            | 0 (0–11)                                            | 0 (0–15)*          | 0 (0–16)                  |
| Pooled                                 |                                             |                    |                           |                                                     |                    |                           |
| Any two of above                       | 40000 (99.4%)                               | 26830 (99.8%)*     | 13878 (99.7%)*            | 21 (1–84)                                           | 53 (8–122)*        | 61 (12–128)*†             |

|                    |               |                |                |          |            |             |
|--------------------|---------------|----------------|----------------|----------|------------|-------------|
| Any three of above | 39010 (96.9%) | 26434 (98.3%)* | 13676 (98.2%)* | 7 (0–35) | 20 (0–71)* | 30 (1–83)*† |
|--------------------|---------------|----------------|----------------|----------|------------|-------------|

---

Abbreviations: ID, infectious diseases; MTB–NAAT, *Mycobacterium tuberculosis*–nucleic acid amplification test;

Data are expressed as the median (1<sup>st</sup>–3<sup>rd</sup> quartiles) or number (%) as appropriate.

\**P*-value <0.05 compared against the group with age of 20–64 years. †*P*-value <0.05 compared against the group with age of 65–79 years.

**Table S3.** Medical resource utilisation from the initial healthcare visits to the commencement of anti-tuberculosis treatment among the 81081 adult patients with pulmonary tuberculosis diagnosed from 2004 to 2009

| Age (years)                     | 20–64<br>N=40261 | 65–79<br>N=26897 | 80 and above<br>N=13923 |
|---------------------------------|------------------|------------------|-------------------------|
| Number of outpatient visits     | 12.23±12.78      | 19.34±17.02*     | 17.38±15.95*†           |
| Medical centers                 | 2.12±4.35        | 3.03±5.52*       | 2.83±5.43*†             |
| Regional hospitals              | 3.24±5.06        | 5.84±7.66*       | 6.25±8.32*†             |
| Local hospitals and clinics     | 6.87±10.21       | 10.47±14.03*     | 8.30±12.36*†            |
| Number of emergency room visits | 0.56±1.43        | 0.84±1.44*       | 1.10±1.71*†             |
| Number of hospitalisation       | 0.87±1.13        | 1.35±1.39*       | 1.71±1.47*†             |
| Number of chest radiography     | 1.85±2.29        | 2.62±3.30*       | 3.28±4.28*†             |
| Number of mycobacterial culture | 2.45±2.22        | 2.86±2.46*       | 3.14±2.61*†             |
| Number of MTB-NAAT              | 0.11±0.41        | 0.13±0.48*       | 0.15±0.52*†             |

Abbreviations: MTB-NAAT, *Mycobacterium tuberculosis* – nucleic acid amplification test.

Data are expressed as the mean ± standard deviation.

\**P*-value <0.05 compared against the group with age of 20-64 years. †*P*-value <0.05 compared against the group with age of 65-79 years.

**Table S4.** Subpopulation analyses for the impact of *Mycobacterium tuberculosis*–nucleic acid amplification tests on shortening treatment delay in multivariate linear regression analyses

| Subpopulation  | Coefficient          | <i>P</i> value |
|----------------|----------------------|----------------|
| All patients   | -2.20 (-3.51, -0.90) | 0.001          |
| Age ≥65 years  | -3.23 (-5.10, -1.36) | 0.001          |
| Age ≥80 years  | -3.97 (-7.09, -0.84) | 0.013          |
| Smear-negative | -4.35 (-6.14, -2.55) | <0.001         |

**Table S5.** Sensitivity analyses for different definitions of delay in treatment by multivariate logistic regression for predictors of complete anti-tuberculosis treatment within 12 months

| Definitions for calculating delay              | Adjusted odds ratio* | <i>p</i> -value |
|------------------------------------------------|----------------------|-----------------|
| Fulfilling $\geq 2$ specific events (per week) | 0.992 (0.990, 0.994) | <0.001          |
| Fulfilling $\geq 3$ specific events (per week) | 0.986 (0.984, 0.989) | <0.001          |
| Fulfilling $\geq 4$ specific events (per week) | 0.983 (0.980, 0.986) | <0.001          |

\*Adjusted for age, sex, implementation of directly observed treatment, short course, diabetes mellitus, chronic obstructive pulmonary disease, malignancy, end-stage renal disease, liver cirrhosis, acquired immunodeficiency syndrome, low income, hospital accreditation levels of initial visits, specialties of initial visits, baseline hospitalization, intensive care, invasive ventilatory support, non-invasive ventilatory support, and second-line anti-tuberculosis treatment.



**Table S6.** Sub-population analyses for the impact of *Mycobacterium tuberculosis* – nucleic acid amplification test to shorten the delay in anti-tuberculosis treatment in multivariate linear regression analysis by adopting a strict definition for delay in anti-TB treatment.

| Sub-population | Coefficient          | <i>p</i> -value |
|----------------|----------------------|-----------------|
| All patients   | -1.04 (-2.11, 0.04)  | 0.058           |
| Age ≥ 65 years | -2.47 (-4.08, -0.86) | 0.003           |
| Age ≥ 80 years | -3.65 (-6.40, -0.90) | 0.009           |
| Smear-negative | -5.16 (-8.09, -2.23) | 0.001           |
